# Supplementary material
Source: Springer Nature journal article supplement (https://www.springermedizin.de/resource/supplementary/13047_2013_603_MOESM10_ESM.pdf/9664184)

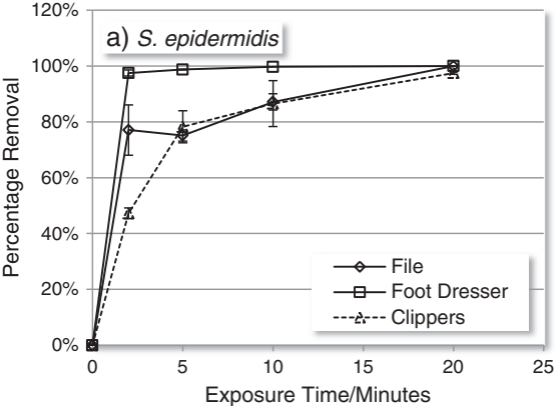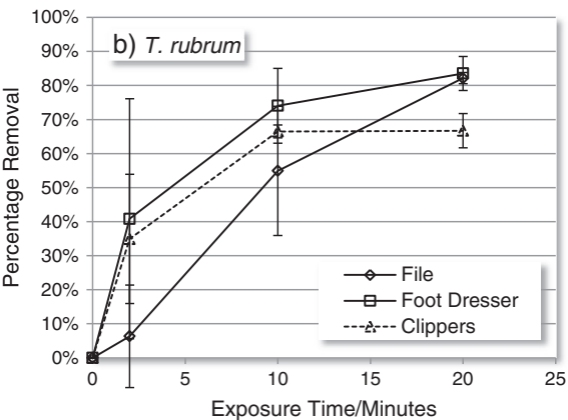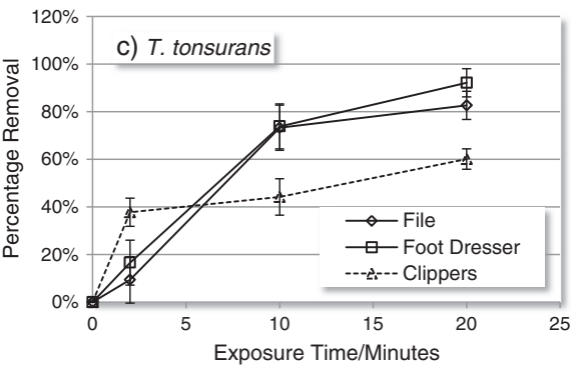

Supplement: MOESM10 [file 9664184]
